# Supplementary material
Source: PubMed Central journal article supplement (PMC6863219)

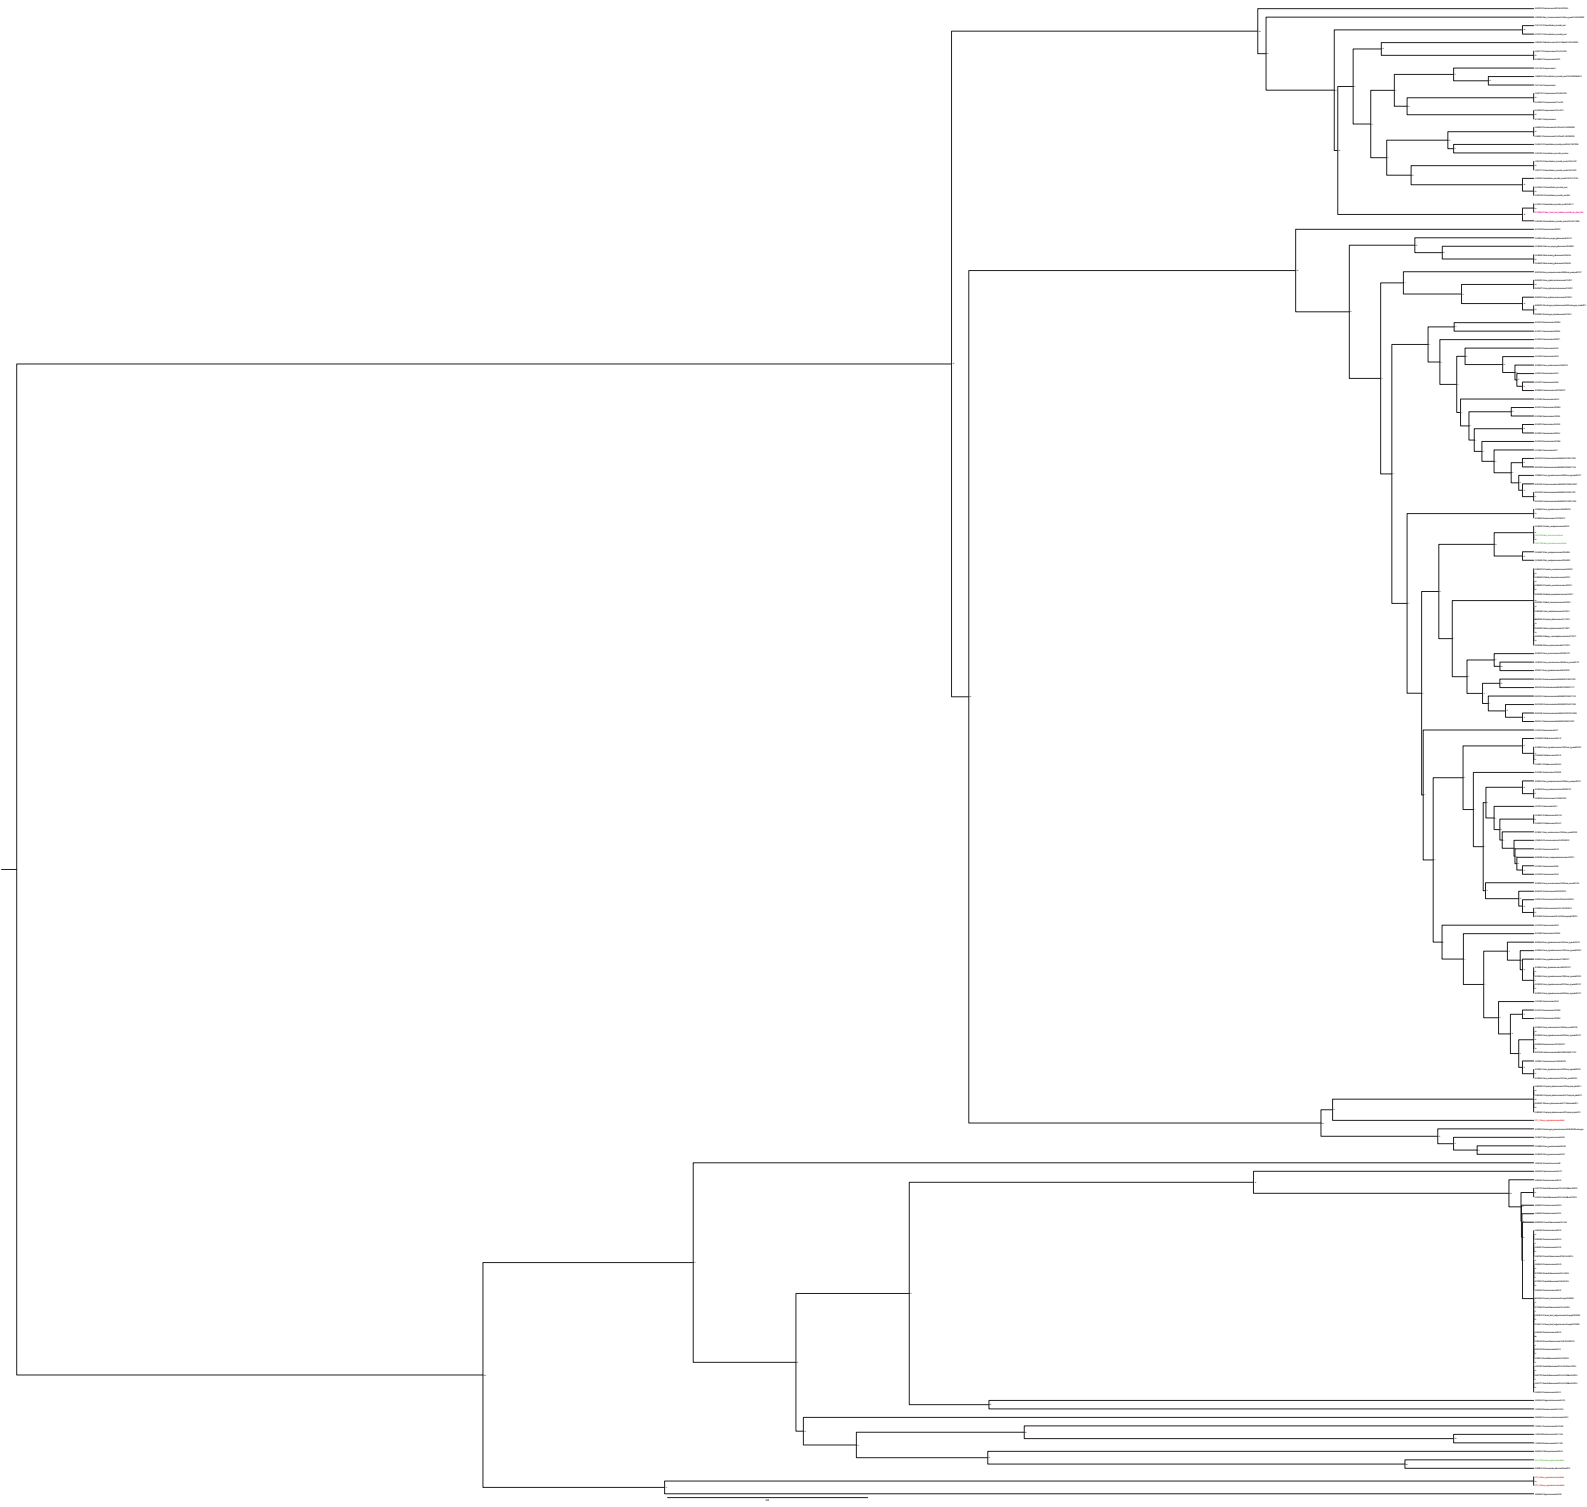

Supplement: 42770_2019_65_MOESM1_ESM.pdf [file 42770_2019_65_MOESM1_ESM.pdf]
